# Supplementary material for: Polymethacrylates containing cage-silsesquioxanes in the side chains: effects of cage and linker structures on film properties
Source: Royal Society of Chemistry journal article supplement (doi:10.1039/d1py01709h), 2022-01-01
Supplement: d1py01709h1.pdf [file d1py01709h1.pdf]

## Supporting Information

### **Polymethacrylates containing cage-silsesquioxanes in the side chains: effects of cage and linker structures on film properties**

*Amato Igarashi, Hiroaki Imoto\*, Kensuke Naka\**

#### **Contents:**

1. NMR spectra
2. MALDI-TOF MS
3. Nanoindentation
4. Solubility test
5. IR spectra
6. Thermal analyses
7. SEC traces
8. Cubic POSS-tethering polymer
9. Cartesian coordinates in the structures optimized by DFT calculations
10. Reference

## 1. NMR spectra

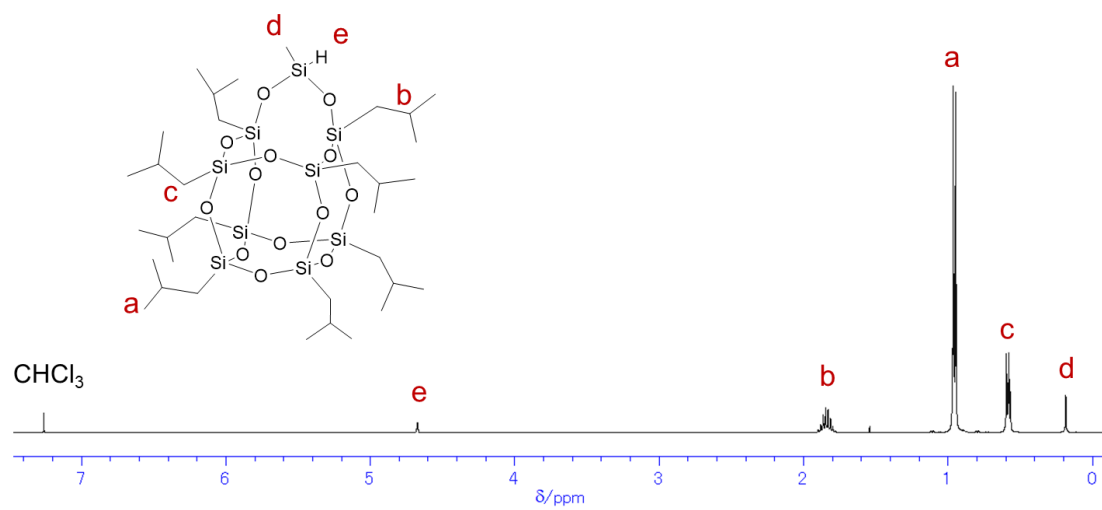

**Figure S1.**  $^1\text{H-NMR}$  spectrum (400 MHz) of **2b** in  $\text{CDCl}_3$ .

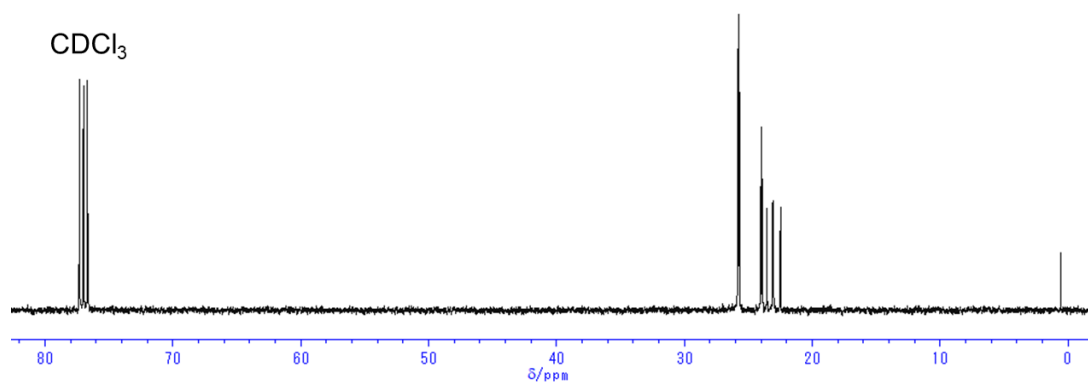

**Figure S2.**  $^{13}\text{C-NMR}$  spectrum (100 MHz) of **2b** in  $\text{CDCl}_3$ .

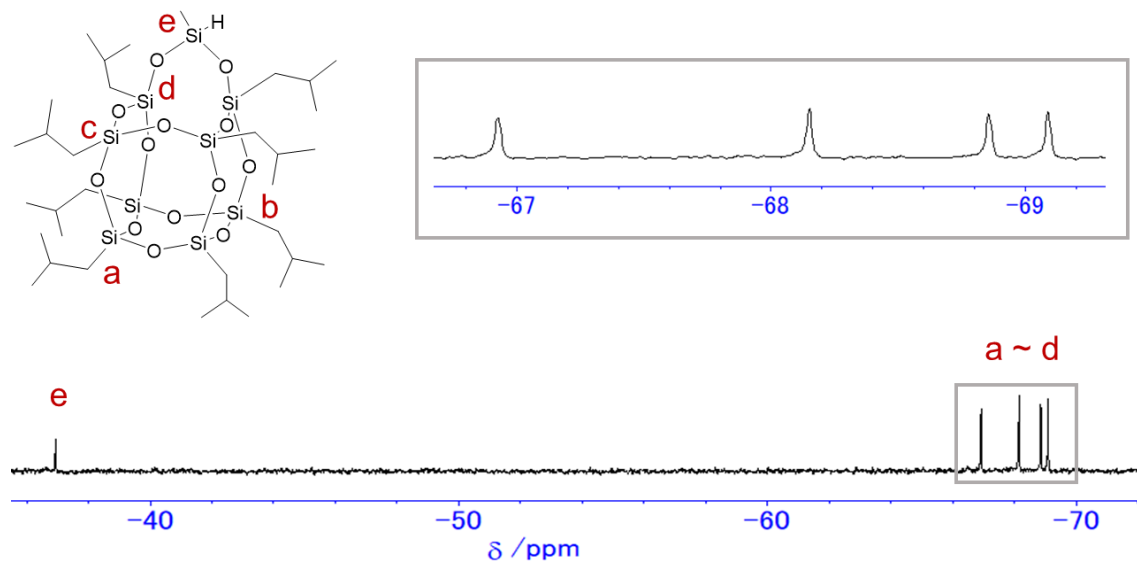

**Figure S3.**  $^{29}\text{Si}$ -NMR spectrum (80 MHz) of **2b** in  $\text{CDCl}_3$ .

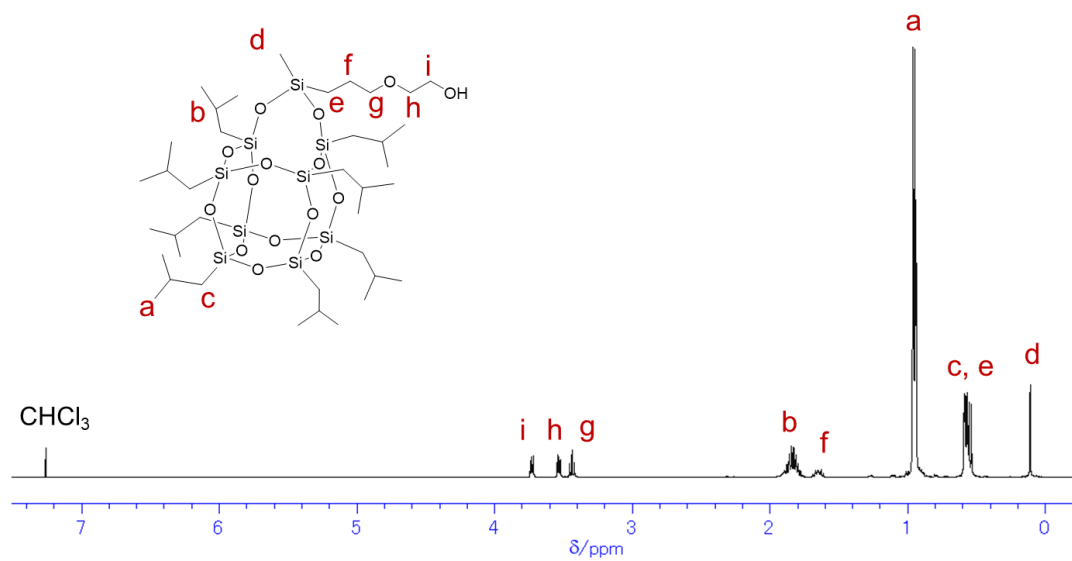

**Figure S4.**  $^1\text{H}$ -NMR spectrum (400 MHz) of **3b** in  $\text{CDCl}_3$ .

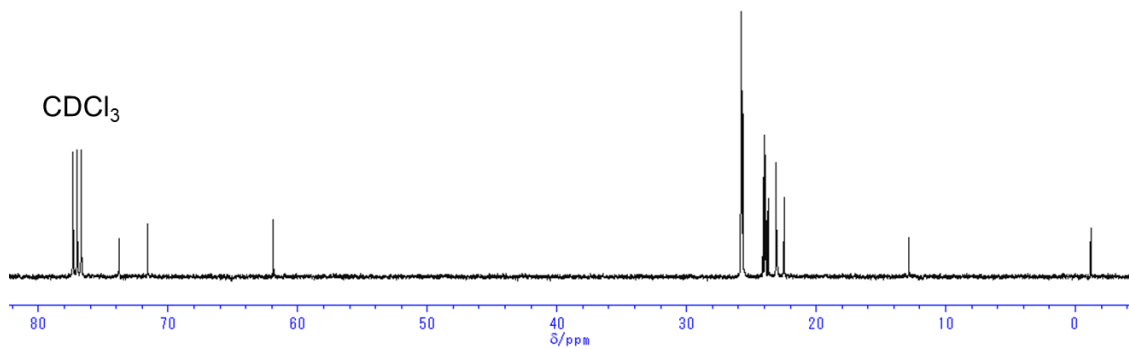

**Figure S5.**  $^{13}\text{C}$ -NMR spectrum (100 MHz) of **3b** in  $\text{CDCl}_3$ .

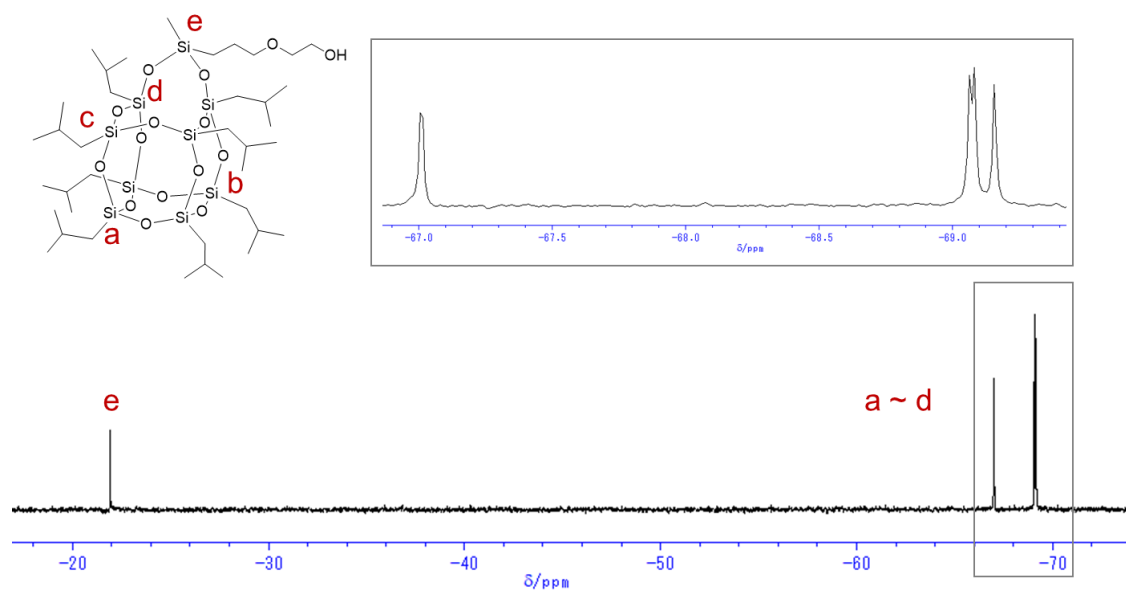

**Figure S6.**  $^{29}\text{Si}$ -NMR spectrum (80 MHz) of **3b** in  $\text{CDCl}_3$ .

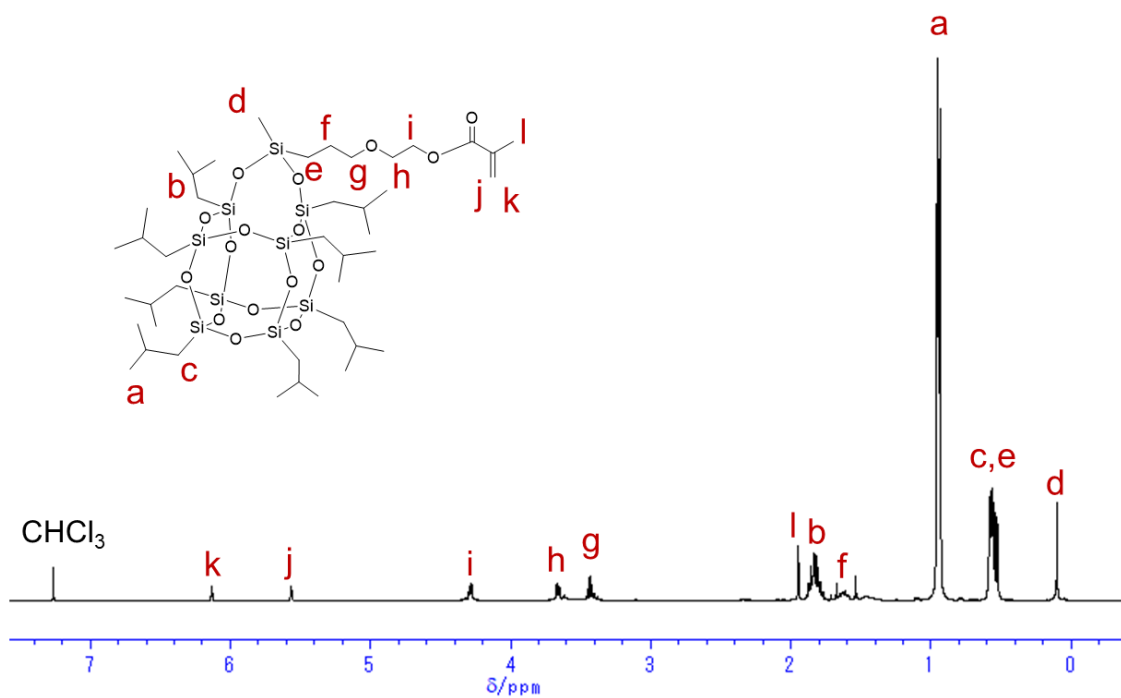

**Figure S7.** <sup>1</sup>H-NMR spectrum (400 MHz) of **4b** in CDCl<sub>3</sub>.

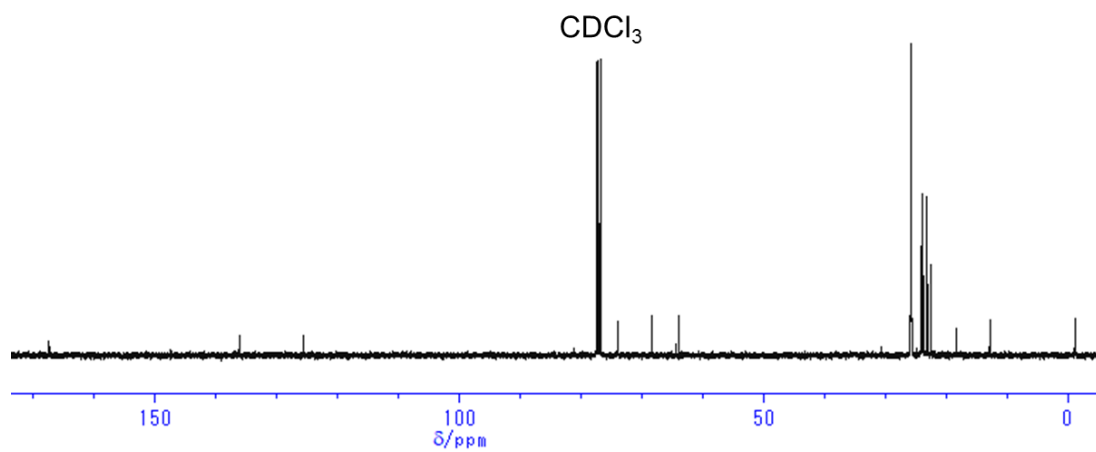

**Figure S8.** <sup>13</sup>C-NMR spectrum (100 MHz) of **4b** in CDCl<sub>3</sub>.

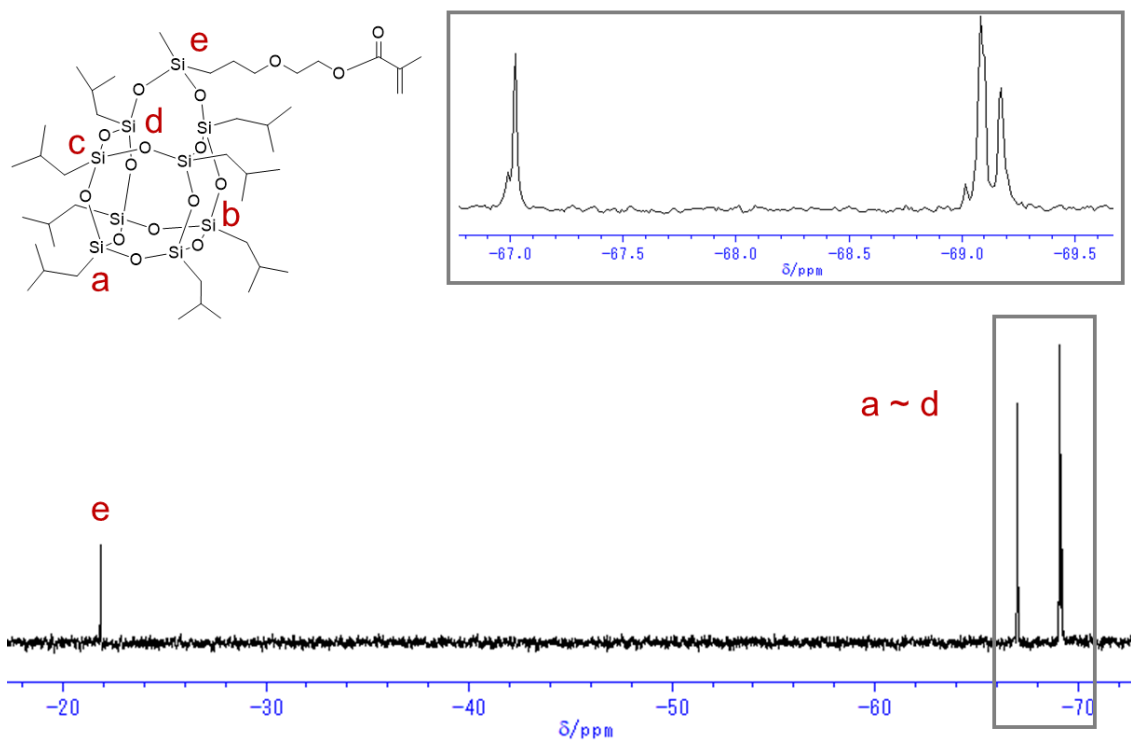

**Figure S9.**  $^{29}\text{Si}$ -NMR spectrum (80 MHz) of **4b** in  $\text{CDCl}_3$ .

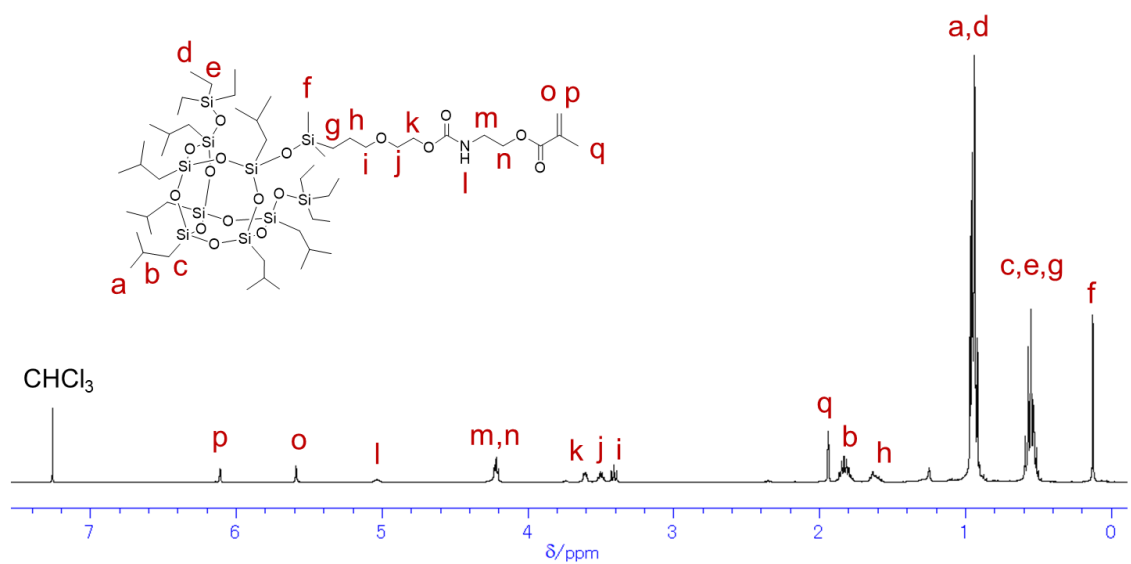

**Figure S10.**  $^1\text{H}$ -NMR spectrum (400 MHz) of **5a** in  $\text{CDCl}_3$ .

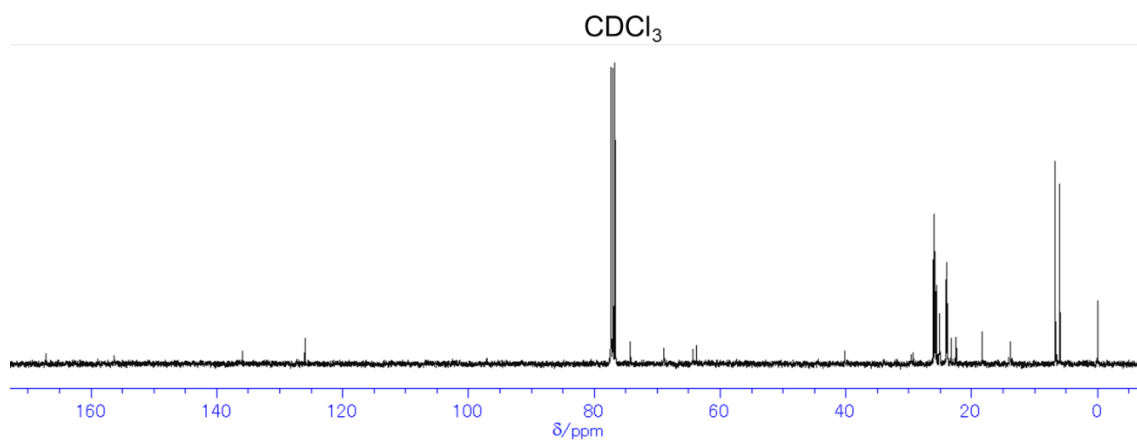

**Figure S11.** <sup>13</sup>C-NMR spectrum (100 MHz) of **5a** in CDCl<sub>3</sub>.

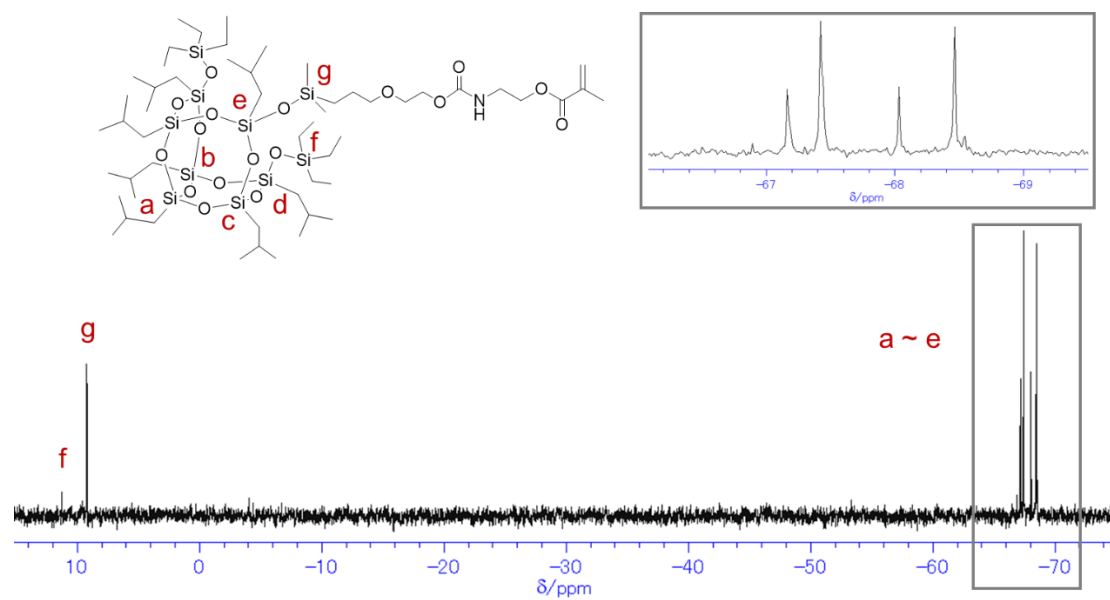

**Figure S12.** <sup>29</sup>Si-NMR spectrum (80 MHz) of **5a** in CDCl<sub>3</sub>.

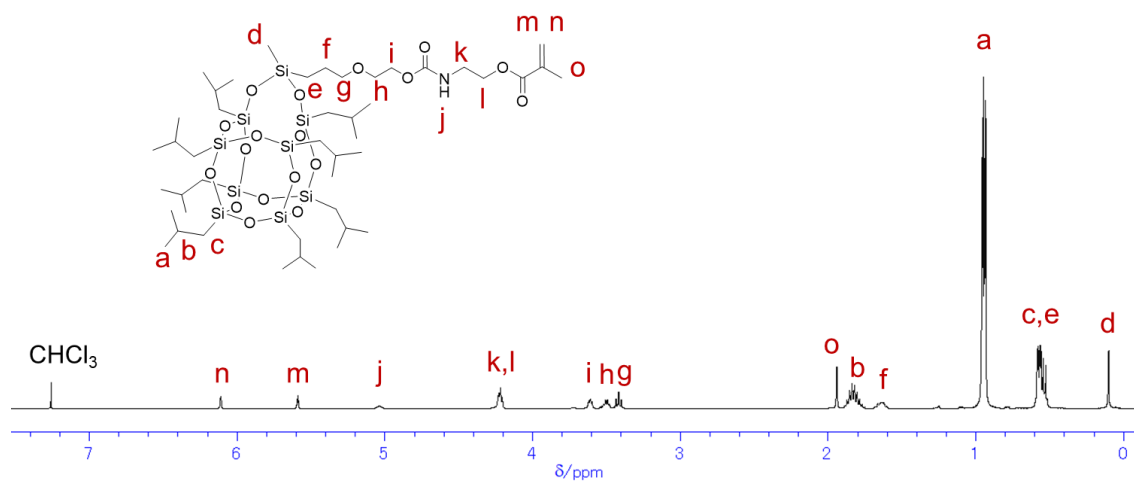

**Figure S13.**  $^1\text{H-NMR}$  spectrum (400 MHz) of **5b** in  $\text{CDCl}_3$ .

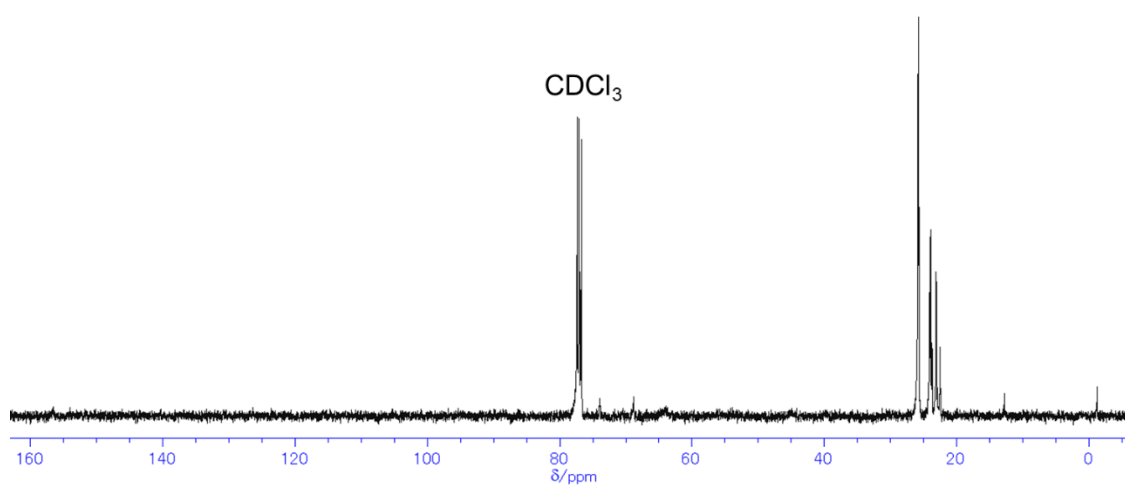

**Figure S14.**  $^{13}\text{C-NMR}$  spectrum (100 MHz) of **5b** in  $\text{CDCl}_3$ .



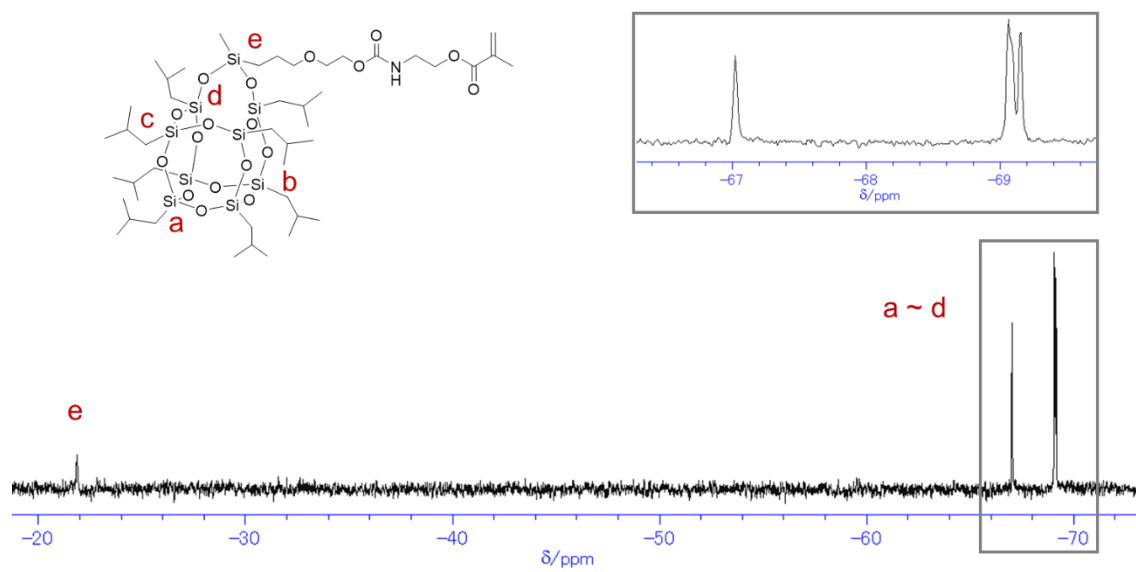

**Figure S15.**  $^{29}\text{Si}$ -NMR spectrum (80 MHz) of **5b** in  $\text{CDCl}_3$ .

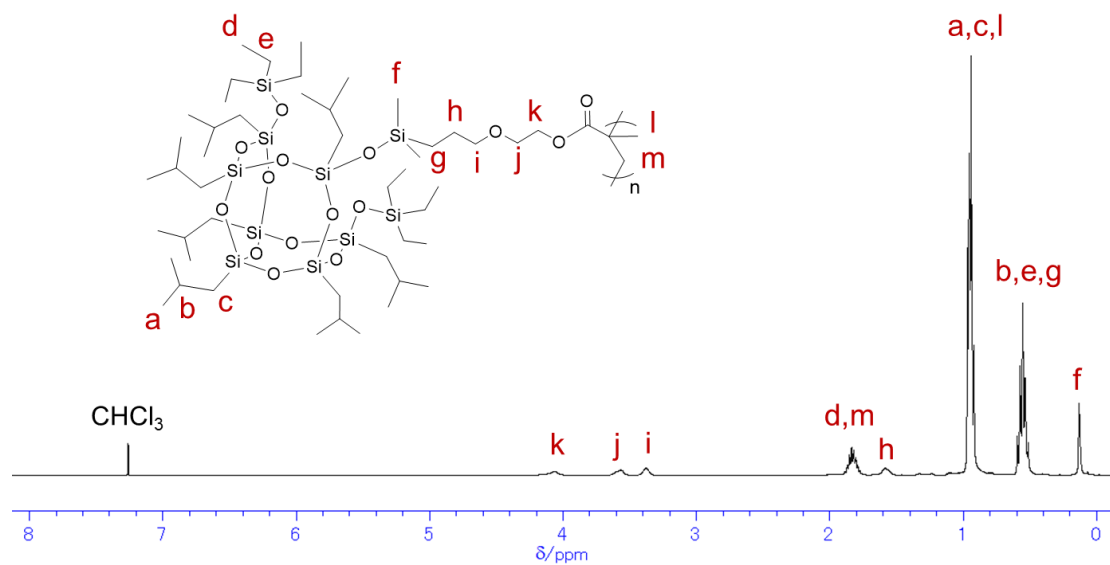

**Figure S16.**  $^1\text{H}$ -NMR spectrum (400 MHz) of **6a** in  $\text{CDCl}_3$ .

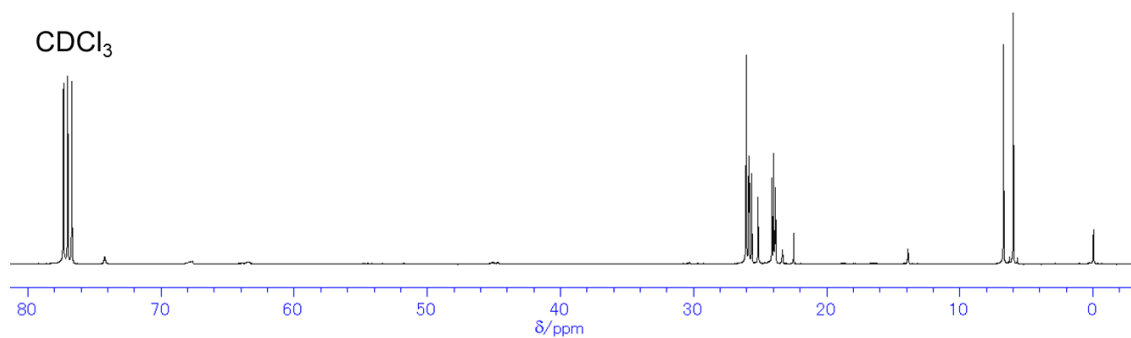

**Figure S17.**  $^{13}\text{C}$ -NMR spectrum (100 MHz) of **6a** in  $\text{CDCl}_3$ .

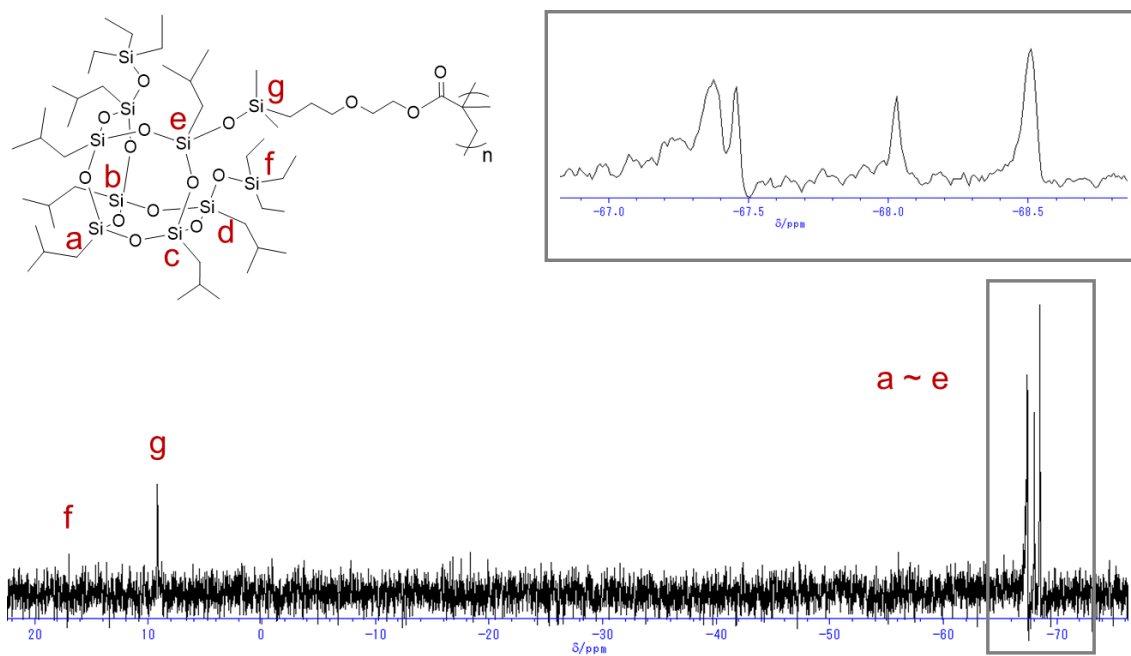

**Figure S18.**  $^{29}\text{Si}$ -NMR spectrum (80 MHz) of **6a** in  $\text{CDCl}_3$ .

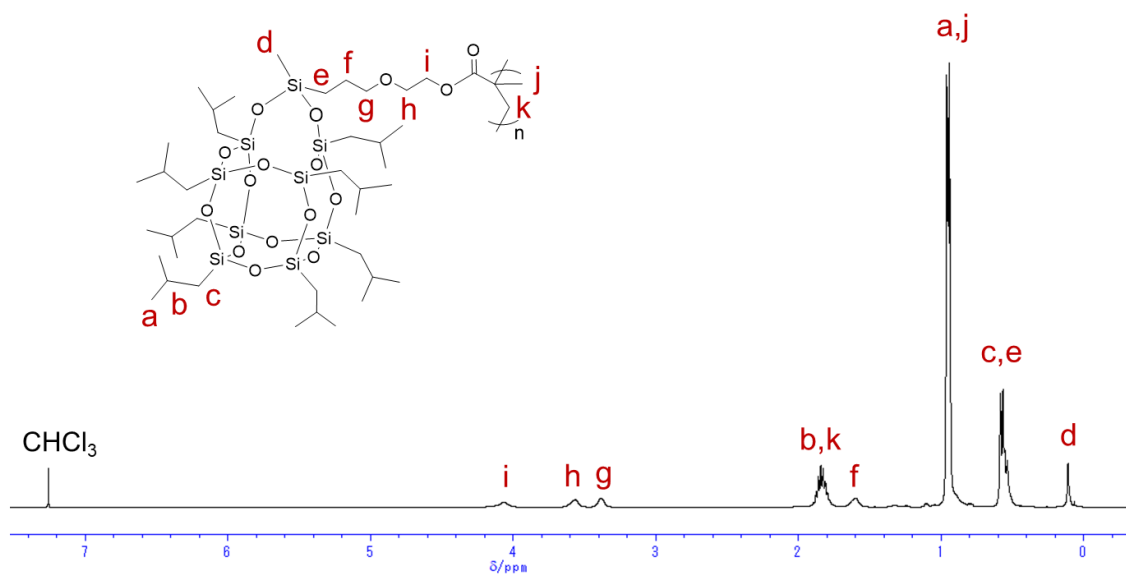

**Figure S19.**  $^1\text{H-NMR}$  spectrum (400 MHz) of **6b** in  $\text{CDCl}_3$ .

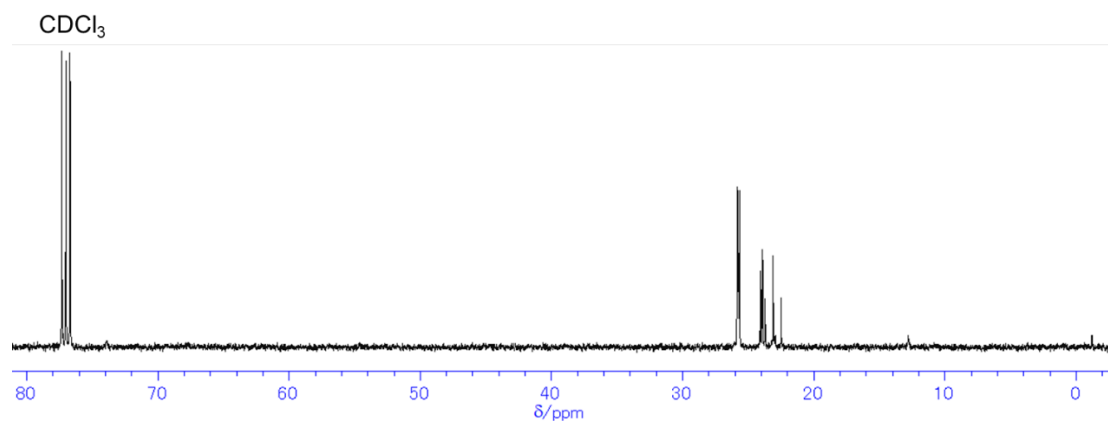

**Figure S20.**  $^{13}\text{C-NMR}$  spectrum (100 MHz) of **6b** in  $\text{CDCl}_3$ .

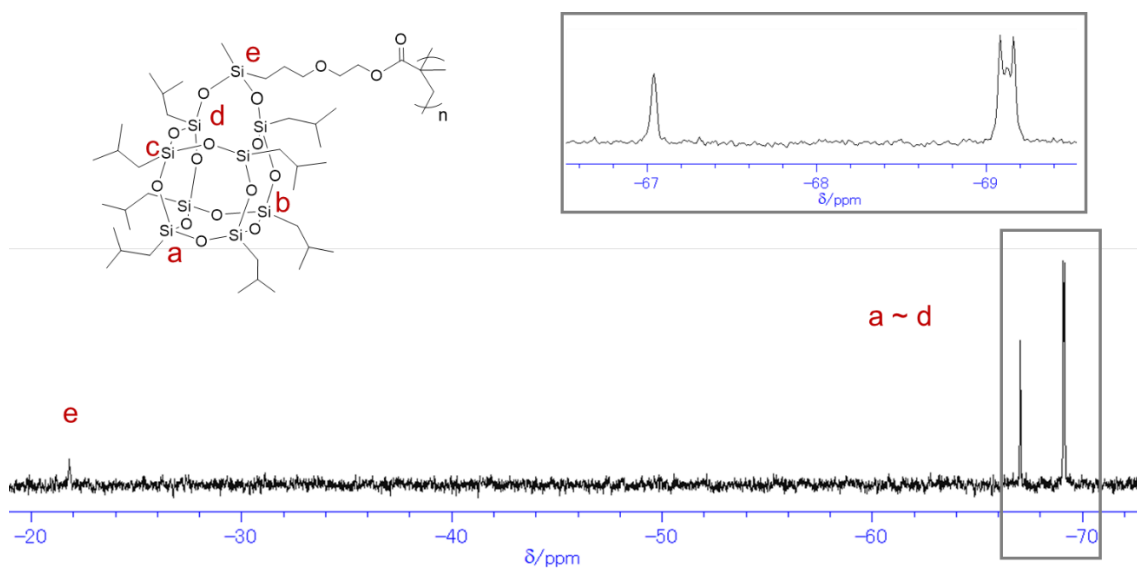

**Figure S21.**  $^{29}\text{Si}$ -NMR spectrum (80 MHz) of **6b** in  $\text{CDCl}_3$ .

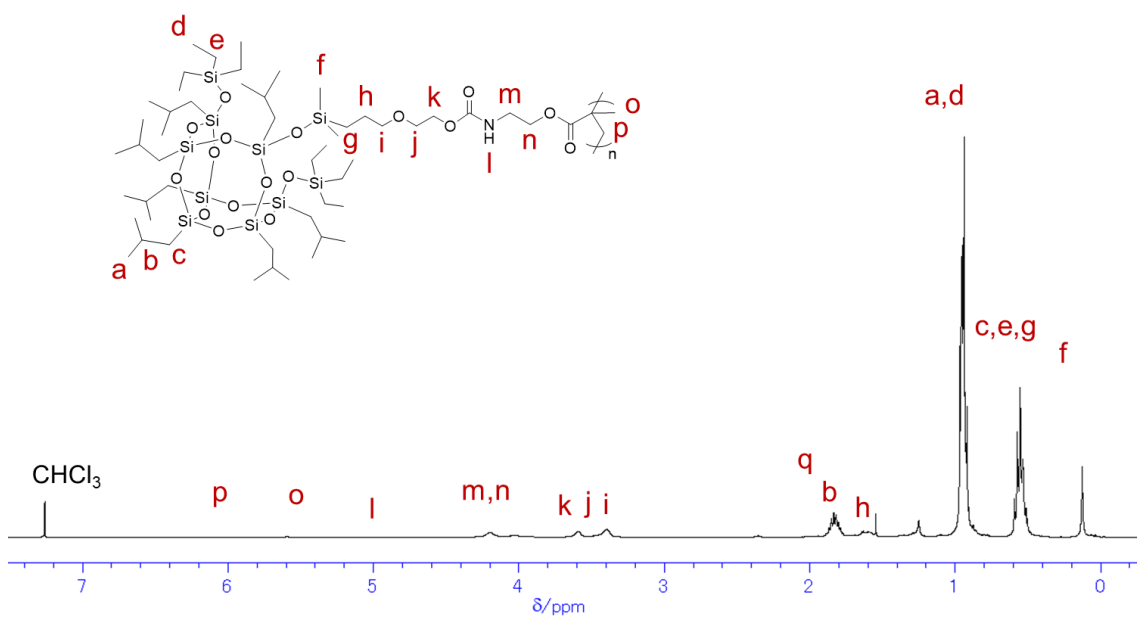

**Figure S22.**  $^1\text{H}$ -NMR spectrum (400 MHz) of **7a** in  $\text{CDCl}_3$ .

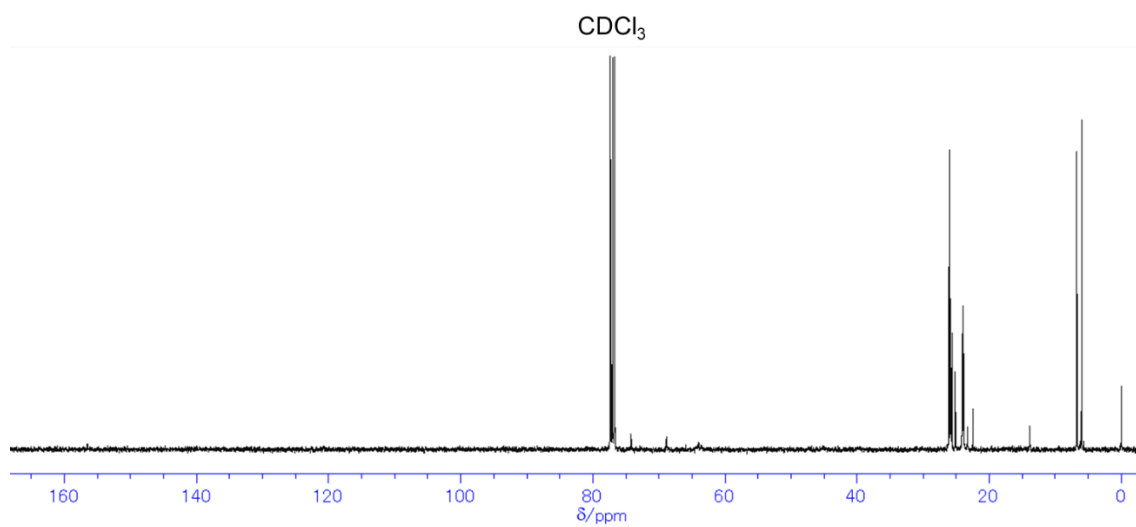

**Figure S23.** <sup>13</sup>C-NMR spectrum (100 MHz) of **7a** in CDCl<sub>3</sub>.

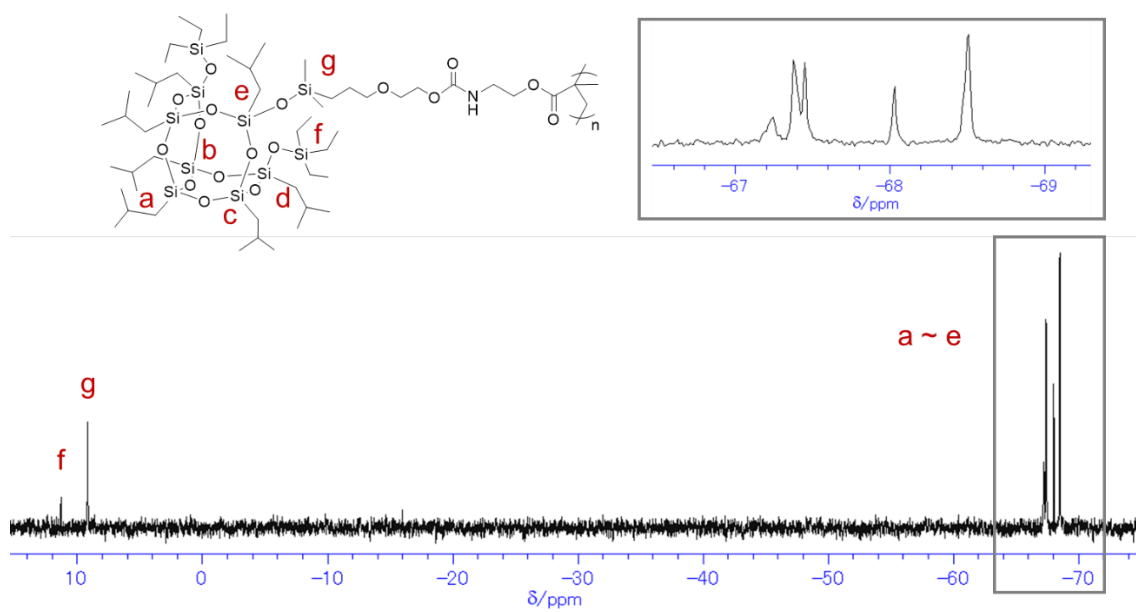

**Figure S24.** <sup>29</sup>Si-NMR spectrum (80 MHz) of **7a** in CDCl<sub>3</sub>.

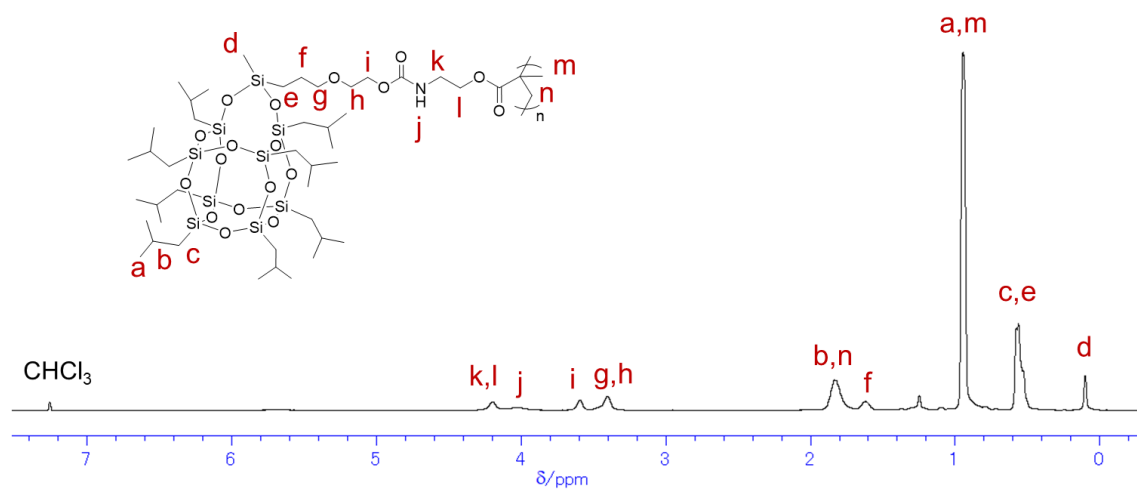

**Figure S25.**  $^1\text{H-NMR}$  spectrum (400 MHz) of **7b** in  $\text{CDCl}_3$ .

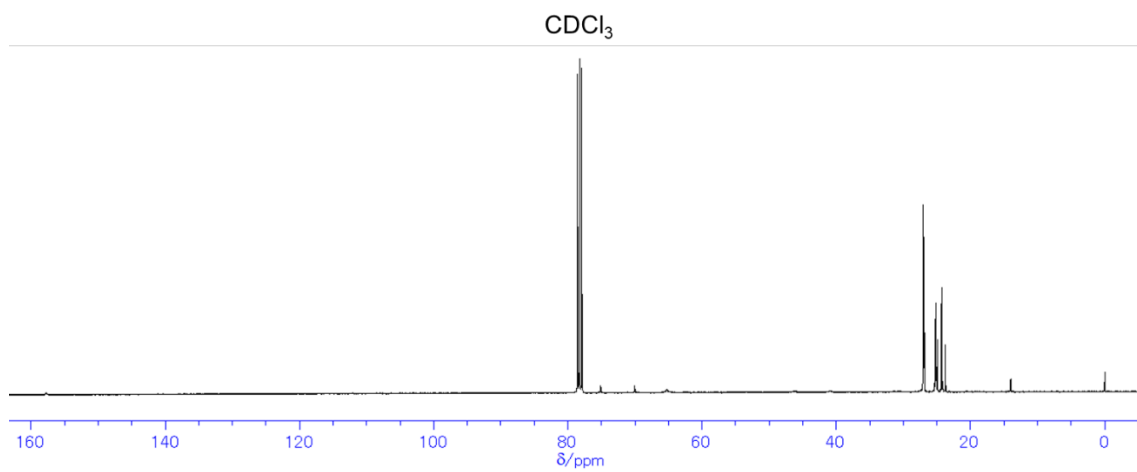

**Figure S26.**  $^{13}\text{C-NMR}$  spectrum (100 MHz) of **7b** in  $\text{CDCl}_3$ .

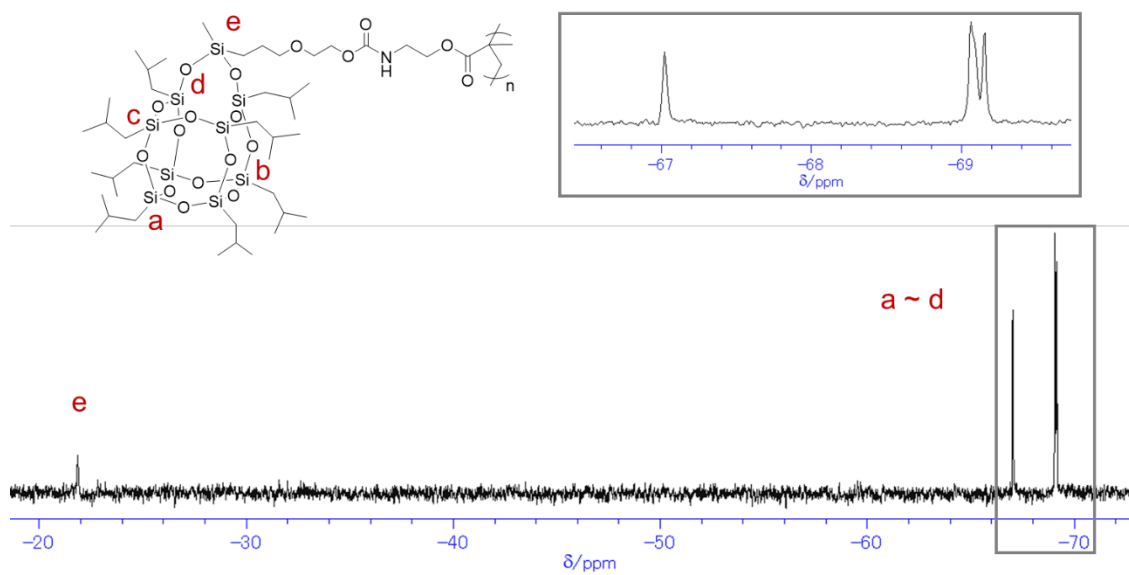

**Figure S27.**  $^{29}\text{Si}$ -NMR spectrum (80 MHz) of **7b** in  $\text{CDCl}_3$ .

## 2. MALDI-TOFMS

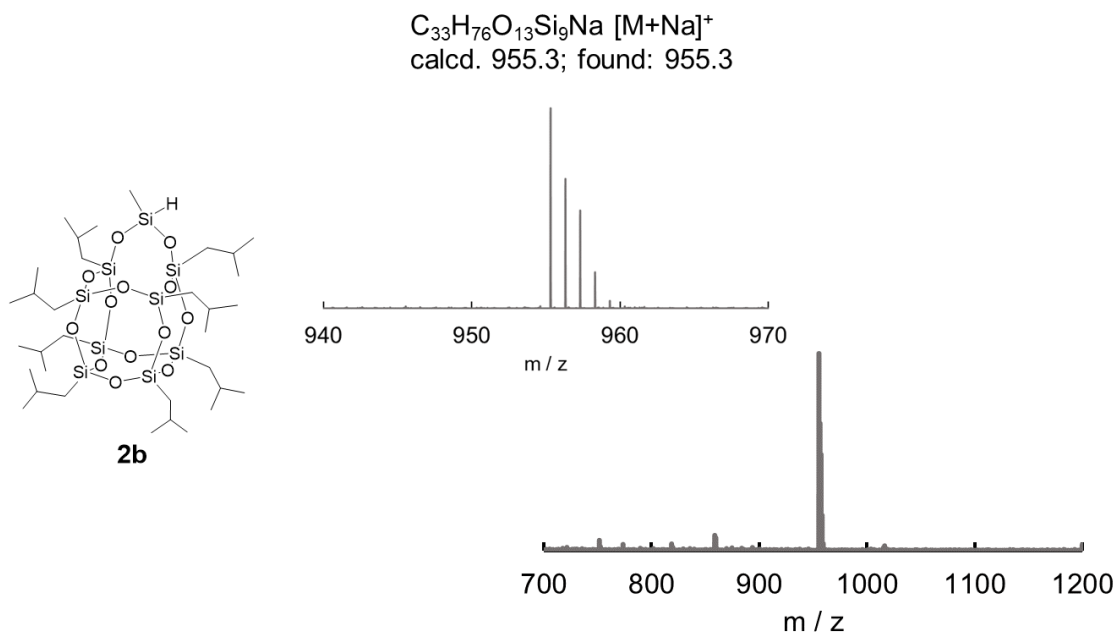

**Figure S28.** MALDI-TOFMS spectrum (full spectrum and expanded view) of **2b**. Matrix: DCTB (20 mg/mL in  $\text{CHCl}_3$ ), cationizing agents: TFANa (1 mg/mL in THF).

### 3. Nanoindentation

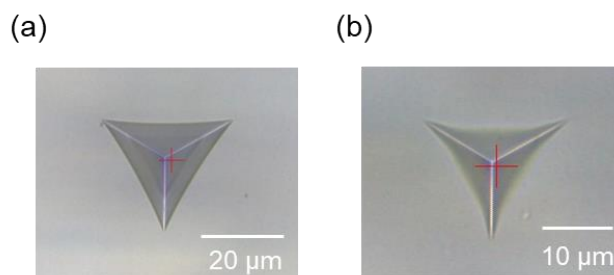

**Figure S29.** Indentation images of (a) **7a-1** and (b) **7b-1** for dynamic ultra-micro-hardness tests.

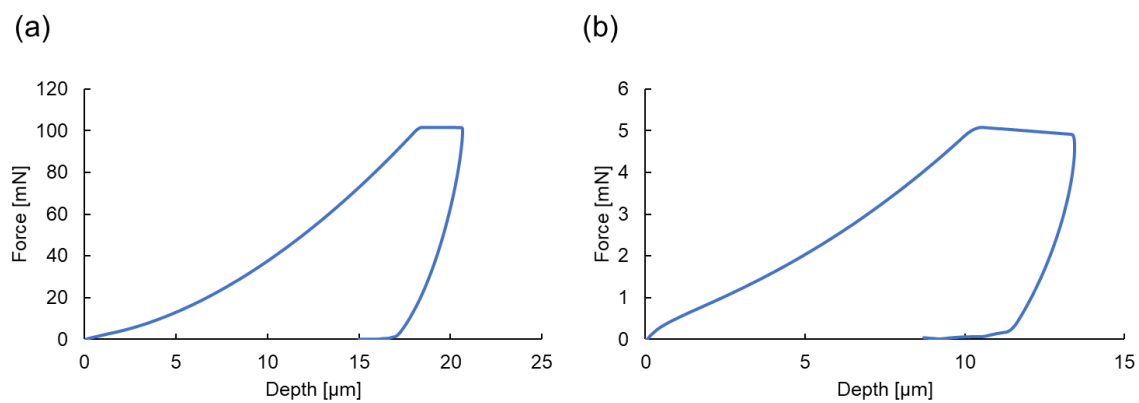

**Figure S30.** Load-depth nanoindentation curves of (a) **7a-1** and (b) **7b-1** for dynamic ultra-micro-hardness tests.



## 4. Solubility test

**Table S1.** Results of solubility test for **2a** and **2b**

|                  | <b>2a</b> | <b>2b</b> |              | <b>2a</b> | <b>2b</b> |
|------------------|-----------|-----------|--------------|-----------|-----------|
| <i>n</i> -Hexane | P         | P         | Acetone      | P         | P         |
| Diethyl ether    | P         | P         | Acetonitrile | F         | F         |
| <i>p</i> -Xylene | P         | P         | DMF          | F         | F         |
| Toluene          | P         | P         | DMSO         | F         | F         |
| Ethyl acetate    | P         | P         | Ethanol      | F+        | F         |
| Chloroform       | P         | P         | Methanol     | F         | F         |
| THF              | P         | P         |              |           |           |

P: Complete dissolution within 2 min

F+: Significant but incomplete dissolution occurred

F: Little or no dissolution was observed

## 5. IR spectra

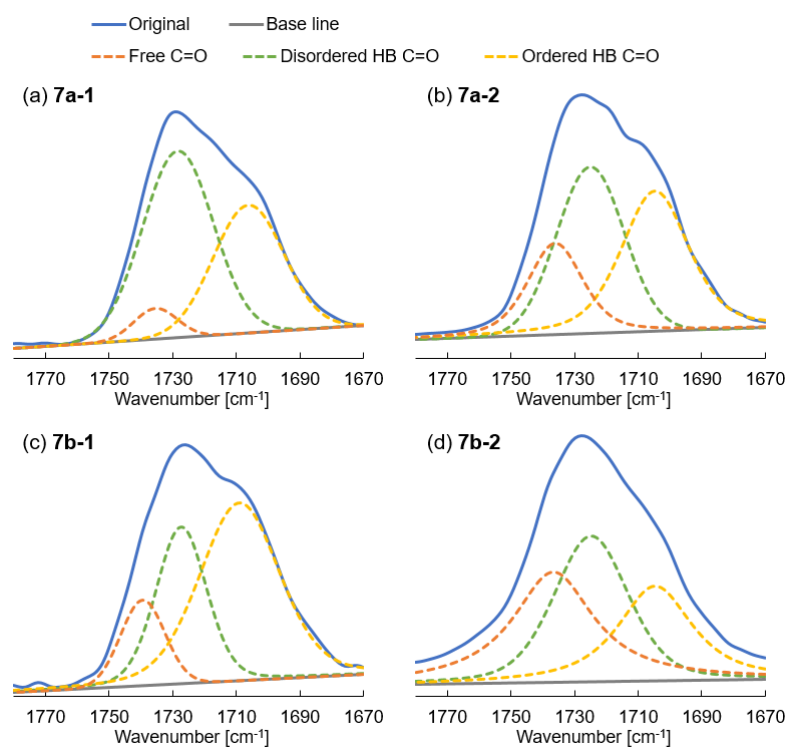

**Figure S31.** IR spectra of (a) **7a-1**, (b) **7a-2**, (c) **7b-1**, and (d) **7b-2** around the signals due to the C=O groups.

## 6. Thermal analyses

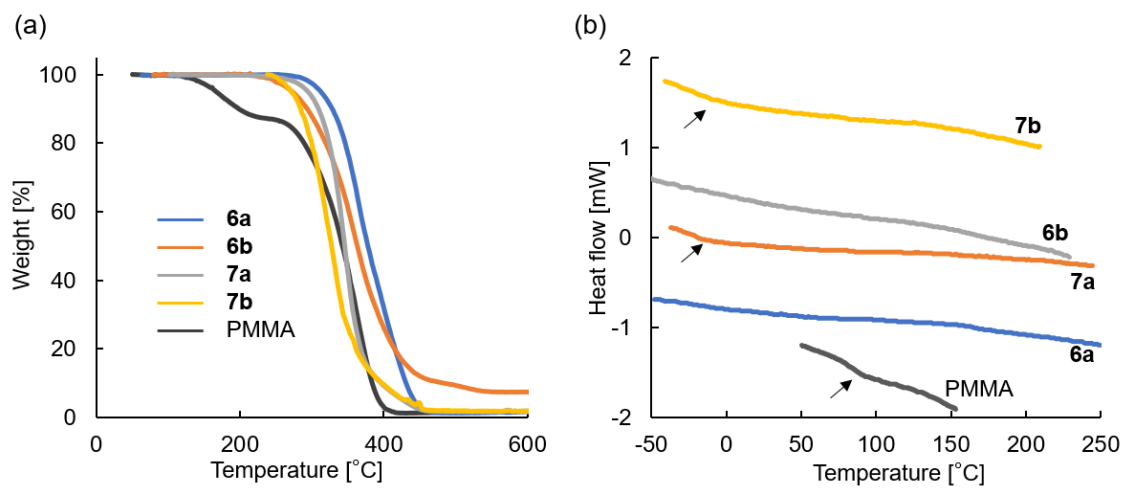

**Figure S32.** (a) TGA thermograms and (b) DSC curves (second scan) of **6a**, **6b**, **7a**, **7b**, and PMMA (under N<sub>2</sub>, 10 °C/min).

## 7. SEC traces

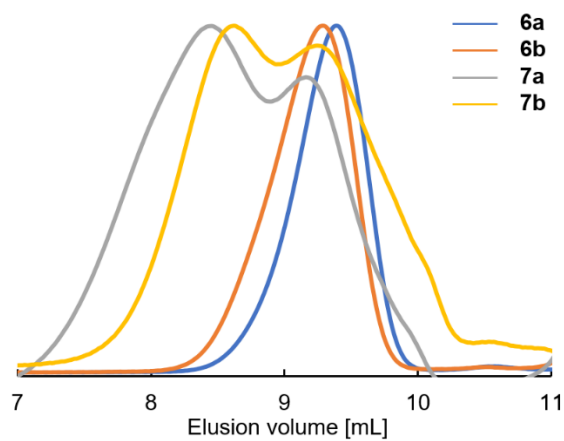

**Figure S33.** SEC traces (1 mL/min in THF, RI detector) of **6a**, **6b**, **7a**, and **7b**.

## 8. Cubic POSS-tethering polymer

A polymer having conventional cubic POSSs (**7c**) in the side chain was synthesized as shown in Scheme S1.

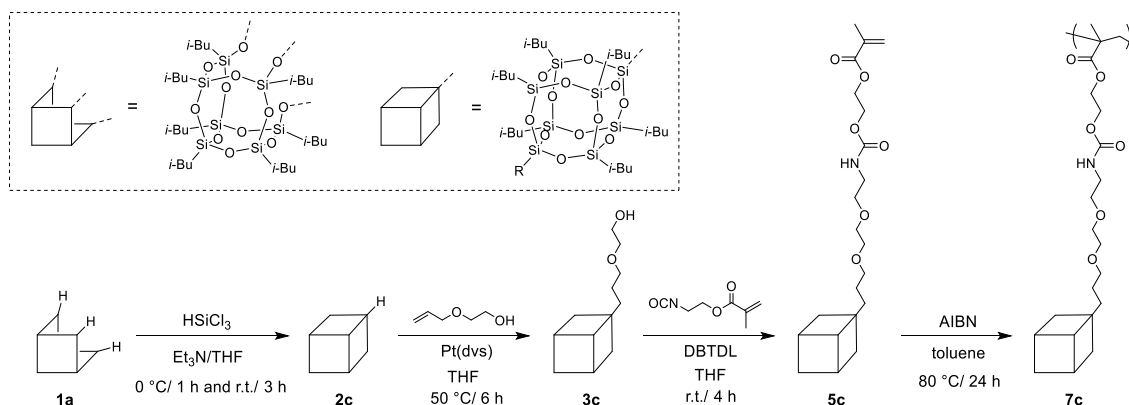

**Scheme S1.** Synthesis of cubic POSS-tethering polymer **7c**

CC-POSS derivatives **2c** and **3c** were prepared according to the literature procedure.<sup>[1]</sup>

**5c**: A THF solution (13.5 mL) of **3c** (1.35 g, 1.47 mmol), 2-isocyanatoethyl methacrylate (0.21 mL, 1.47 mmol), and catalytic amounts of dibutyltin(IV) dilaurate (five drops) were stirred at room temperature for 4 h under N<sub>2</sub> atmosphere. The volatiles were removed *in vacuo* to obtain **5c** (1.48 g, 1.38 mmol, 94%) as colorless liquid. <sup>1</sup>H-NMR (in CDCl<sub>3</sub>, 400 MHz):  $\delta$  6.11 (s, 1H), 5.59 (s, 1H), 5.13-4.97 (br, 1H), 4.29-4.14 (m, 4H), 3.66-3.56 (m, 2H), 3.54-3.46 (m, 2H), 3.45-3.38 (t,  $J = 14.0$  Hz, 2H), 1.94 (s, 3H), 1.91-1.75 (m, 7H), 1.74-1.58 (m, 2H), 1.08-0.83 (m, 42H), 0.72-0.47 (m, 16H), 0.11 (s, 3H) ppm. <sup>13</sup>C-NMR (CDCl<sub>3</sub>, 100 MHz)  $\delta$  167.21, 156.33, 135.95, 126.00, 77.35, 77.03, 76.71, 73.51, 68.84, 64.29, 64.15, 63.74, 40.15, 29.60, 29.49, 29.27, 25.69, 23.88, 23.86, 22.75, 22.50, 22.47, 18.29, 8.16 ppm. <sup>29</sup>Si-NMR (in CDCl<sub>3</sub>, 80 MHz):  $\delta$  -67.38, -67.65, -67.85 ppm.

**7c**: A toluene solution (0.50 mL) of **5c** (0.60 g, 0.56 mmol) and AIBN (9 mg, 0.05 mmol) was stirred at  $80\text{ }^\circ\text{C}$  for 24 h under N<sub>2</sub> atmosphere. After the volatiles were removed *in vacuo*, the residue was dissolved in CHCl<sub>3</sub> to be subjected to reprecipitation into acetone. The precipitates were collected by centrifugation to obtain **7c** (0.30 g, 0.28 mmol, 50%) as colorless liquid. <sup>1</sup>H-NMR (in CDCl<sub>3</sub>, 400 MHz):  $\delta$  4.60-4.14 (br, 4H), 4.14-3.80 (br, 1H), 3.67-3.53 (br, 2H), 3.53-3.18 (br, 4H), 1.99-1.73 (m, 9H), 1.72-1.58 (br, 2H), 1.09-0.83 (d, 45H), 0.71-0.47 (d, 16H) ppm. <sup>13</sup>C-NMR (CDCl<sub>3</sub>, 100 MHz)  $\delta$  156.54, 73.44,

68.74, 63.94, 63.90, 44.95, 39.63, 30.33, 29.35, 28.30, 25.70, 23.86, 23.84, 23.04, 22.70, 22.50, 22.46, 21.97, 8.18 ppm.  $^{29}\text{Si}$ -NMR (in  $\text{CDCl}_3$ , 80 MHz):  $\delta$  -67.40, -67.67, -67.89 ppm. SEC (1 mL/min in THF, polystyrene standards):  $M_n = 27,100$ ,  $M_w/M_n = 2.88$ .

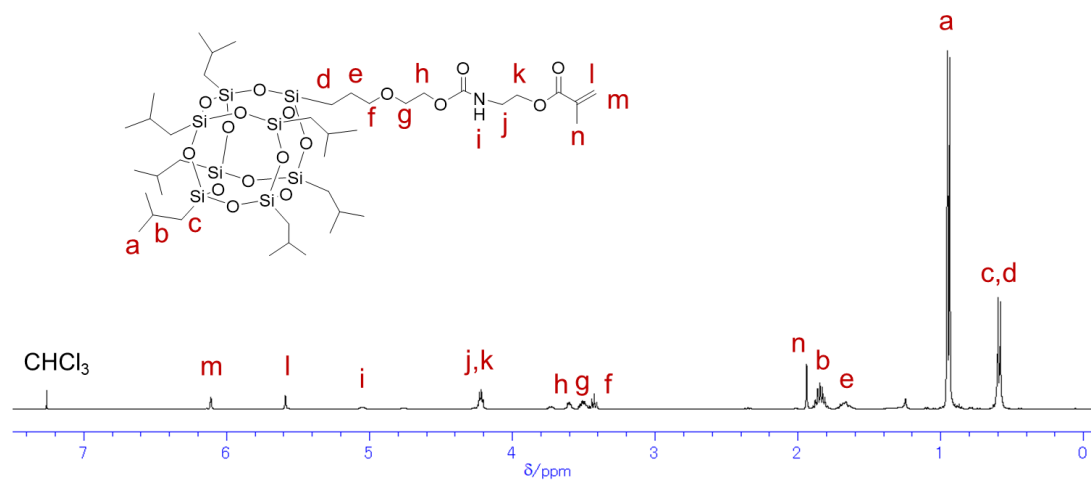

**Figure S34.**  $^1\text{H}$ -NMR spectrum (400 MHz) of **5c** in  $\text{CDCl}_3$ .

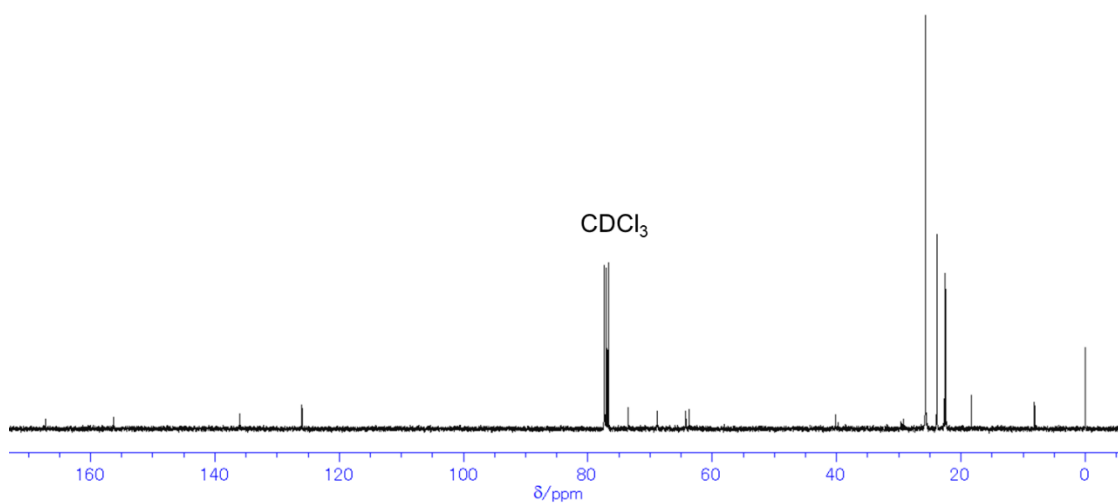

**Figure S35.**  $^{13}\text{C}$ -NMR spectrum (100 MHz) of **5c** in  $\text{CDCl}_3$ .

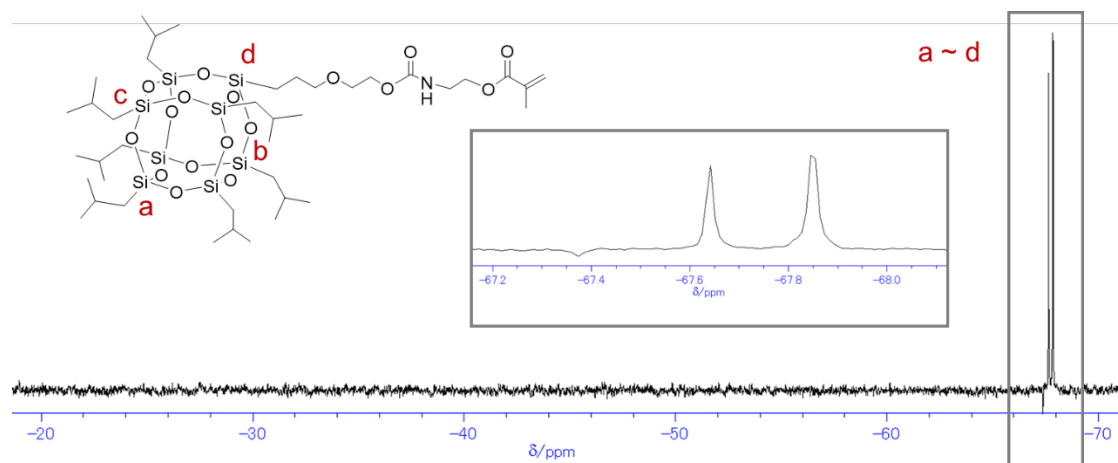

Figure S36.  $^{29}\text{Si}$ -NMR spectrum (80 MHz) of **5c** in  $\text{CDCl}_3$ .

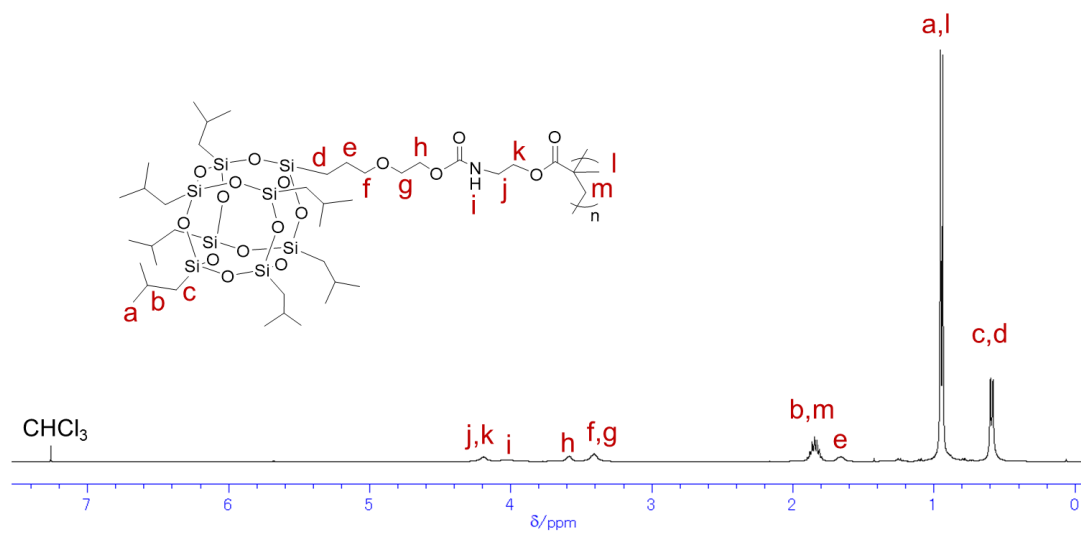

Figure S37.  $^1\text{H}$ -NMR spectrum (400 MHz) of **7c** in  $\text{CDCl}_3$ .

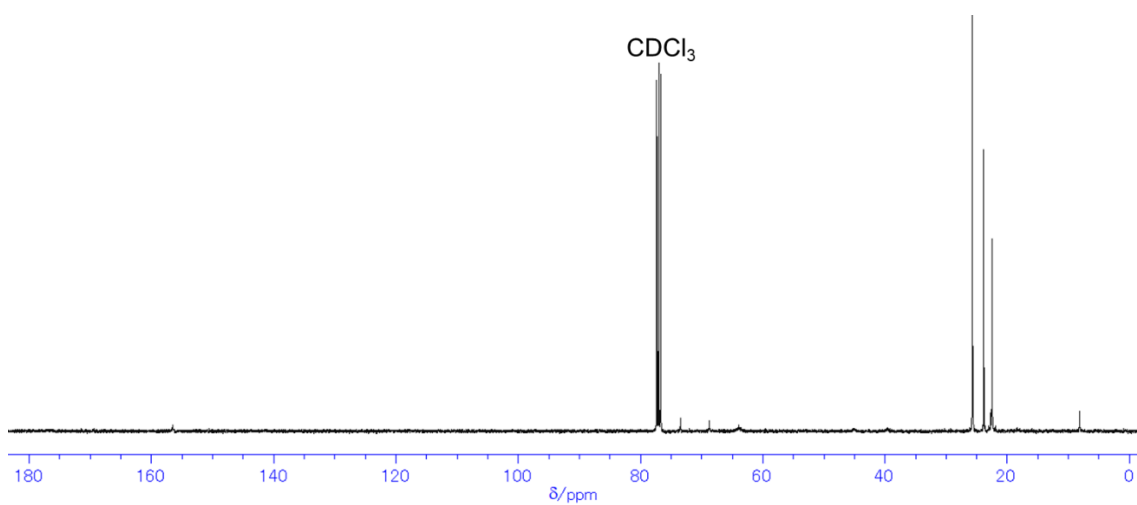

**Figure S38.**  $^{13}\text{C}$ -NMR spectrum (100 MHz) of **7c** in  $\text{CDCl}_3$ .

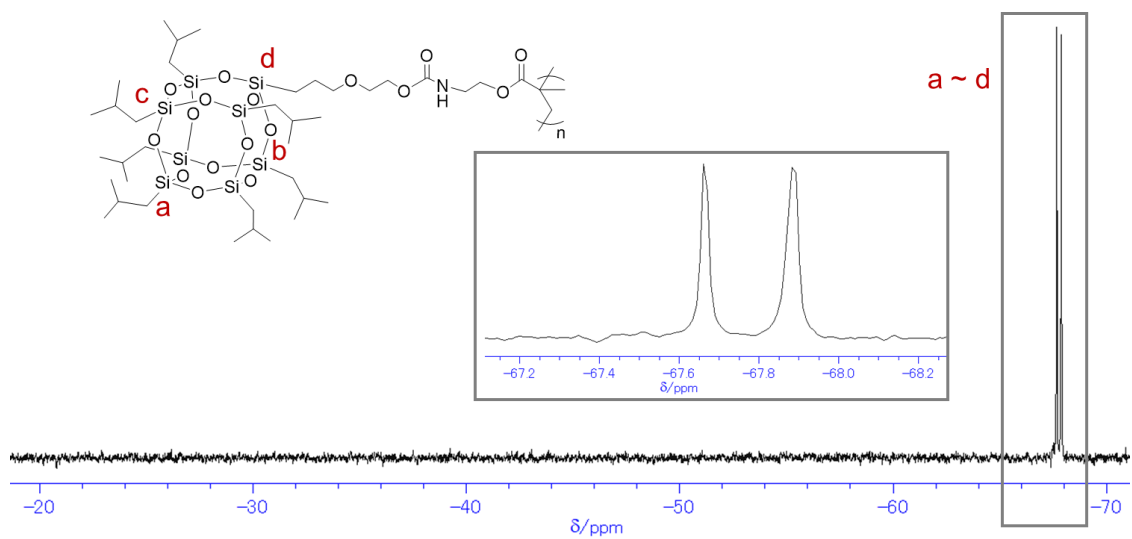

**Figure S39.**  $^{29}\text{Si}$ -NMR spectrum (80 MHz) of **7c** in  $\text{CDCl}_3$ .

Polymer **7c** was dissolved in  $\text{CHCl}_3$ , and the solution was casted onto a glass substrate. The cast film was dried for 24 h under the ambient condition, and the brittle film was obtained (Figure S40a). The PXRD pattern of **7c** indicated the high crystallinity (Figure S40b).

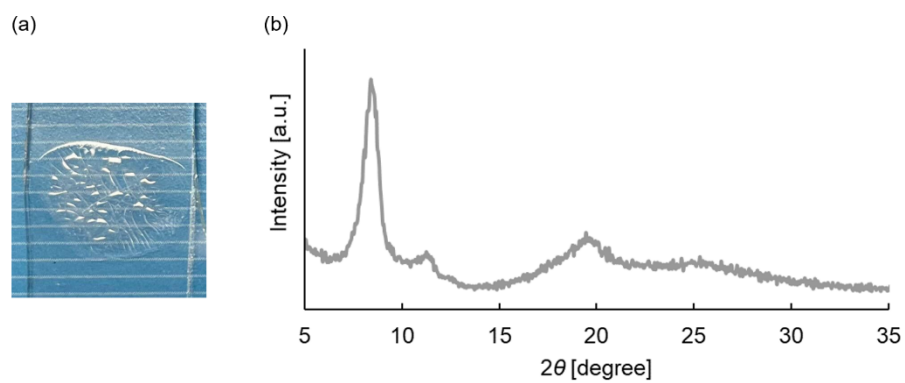

**Figure S40.** (a) Photograph and (b) PXRD pattern of polymer **7c**

## 9. Cartesian coordinates in the structures optimized by DFT calculations

### 2a'

|    |         |         |         |
|----|---------|---------|---------|
| Si | -3.2067 | -0.2455 | 0.7455  |
| Si | 4.8818  | -0.3866 | -1.1503 |
| O  | -3.1078 | -1.1809 | -0.5977 |
| Si | -2.2025 | -2.1771 | -1.5528 |
| O  | -0.6861 | -2.3052 | -0.9108 |
| Si | 0.3074  | -2.8192 | 0.2905  |
| O  | -0.441  | -2.6328 | 1.7514  |
| Si | -1.2626 | -1.6481 | 2.7884  |
| O  | -2.6187 | -1.0699 | 2.0523  |
| Si | -1.6121 | 2.4695  | 1.1299  |
| Si | 2.621   | -0.8268 | 1.0623  |
| Si | 0.6165  | 0.904   | 2.7597  |
| O  | -1.0737 | 3.3678  | -0.1231 |
| O  | -0.3452 | 2.0651  | 2.1106  |
| O  | 1.6961  | 0.4227  | 1.6129  |
| O  | 3.712   | -0.1962 | 0.0281  |
| C  | -3.0342 | -3.8418 | -1.6468 |
| C  | 0.7473  | -4.6135 | 0.0645  |
| C  | -4.9913 | 0.1798  | 1.0528  |
| C  | -1.7486 | -2.6129 | 4.299   |
| C  | 1.4882  | 1.6049  | 4.2458  |
| O  | 1.6724  | -1.9037 | 0.2451  |
| O  | -2.2915 | 1.1021  | 0.5096  |
| O  | -0.291  | -0.392  | 3.2318  |
| O  | -2.0871 | -1.5504 | -3.0544 |
| C  | 3.4654  | -1.6887 | 2.4893  |
| H  | -2.4577 | -4.5361 | -2.2679 |
| H  | -3.1462 | -4.2858 | -0.651  |
| H  | -0.149  | -5.2433 | 0.0784  |
| H  | 1.413   | -4.9579 | 0.8634  |
| H  | -5.1045 | 0.805   | 1.9451  |
| H  | -5.4107 | 0.7238  | 0.1996  |
| H  | -0.8657 | -3.0152 | 4.807   |



|    |         |         |         |
|----|---------|---------|---------|
| H  | -2.2894 | -1.978  | 5.0087  |
| H  | 2.1067  | 2.4636  | 3.963   |
| H  | 2.1386  | 0.8564  | 4.7114  |
| H  | 4.0739  | -2.5289 | 2.1354  |
| H  | 4.1257  | -1.0018 | 3.0308  |
| C  | -2.8602 | 3.4271  | 2.1323  |
| H  | -2.4119 | 4.3383  | 2.5437  |
| H  | -3.716  | 3.7224  | 1.5153  |
| Si | 0.1932  | 4.2639  | -0.755  |
| Si | -1.5016 | -0.334  | -4.0461 |
| C  | 5.2141  | -2.2257 | -1.4125 |
| H  | 4.2982  | -2.7527 | -1.7048 |
| H  | 5.958   | -2.3855 | -2.203  |
| H  | 5.5959  | -2.7005 | -0.5004 |
| C  | 4.2622  | 0.4042  | -2.7407 |
| H  | 5.0215  | 0.3529  | -3.5312 |
| H  | 3.3604  | -0.0987 | -3.108  |
| H  | 4.0103  | 1.4592  | -2.5833 |
| C  | 0.8795  | 5.3977  | 0.5882  |
| H  | 1.714   | 6.0014  | 0.2099  |
| H  | 0.1126  | 6.0888  | 0.9583  |
| H  | 1.2481  | 4.8179  | 1.4425  |
| C  | -0.5278 | 5.2775  | -2.1692 |
| H  | -1.3062 | 5.9607  | -1.8094 |
| H  | 0.2442  | 5.8807  | -2.6629 |
| H  | -0.9808 | 4.627   | -2.9263 |
| C  | -2.0749 | -0.7527 | -5.7913 |
| H  | -3.169  | -0.7907 | -5.8493 |
| H  | -1.728  | -0.0045 | -6.5149 |
| H  | -1.6902 | -1.7286 | -6.1099 |
| C  | -2.2091 | 1.3204  | -3.4901 |
| H  | -1.8399 | 2.1379  | -4.123  |
| H  | -3.3039 | 1.3222  | -3.5528 |
| H  | -1.937  | 1.5473  | -2.4528 |
| C  | 1.5293  | 3.0923  | -1.374  |
| H  | 1.8888  | 2.4384  | -0.5709 |

|   |         |         |         |
|---|---------|---------|---------|
| H | 2.3895  | 3.6474  | -1.7701 |
| C | 0.3803  | -0.3259 | -3.9478 |
| H | 0.7156  | -0.1658 | -2.9166 |
| H | 0.8118  | 0.4665  | -4.5722 |
| H | 0.796   | -1.2826 | -4.2862 |
| H | -2.3986 | -3.4524 | 4.0304  |
| C | 6.4378  | 0.4824  | -0.5374 |
| H | 6.2442  | 1.5425  | -0.3359 |
| H | 7.2448  | 0.4251  | -1.2784 |
| H | 6.806   | 0.0298  | 0.391   |
| H | 2.7335  | -2.0862 | 3.2022  |
| H | 1.148   | 2.4508  | -2.177  |
| H | 1.2569  | -4.7699 | -0.8925 |
| H | -4.0333 | -3.7484 | -2.086  |
| H | 0.7665  | 1.9398  | 4.9986  |
| H | -3.2355 | 2.8323  | 2.9732  |
| H | -5.5855 | -0.7286 | 1.1996  |

**2b'**

|    |          |          |          |
|----|----------|----------|----------|
| Si | -2.78543 | -1.55996 | -0.18975 |
| Si | 1.648356 | -2.237   | -0.46945 |
| O  | -1.81024 | -2.15676 | 0.996322 |
| Si | -0.45321 | -2.00079 | 1.919066 |
| O  | -0.39948 | -0.4875  | 2.56574  |
| Si | -0.33465 | 1.1432   | 2.367258 |
| O  | -1.73167 | 1.680078 | 1.676736 |
| Si | -2.7581  | 1.573165 | 0.390042 |
| O  | -3.18219 | -0.00064 | 0.158984 |
| Si | -0.64463 | -1.1172  | -2.45375 |
| Si | 1.68545  | 2.231035 | 0.114578 |
| Si | -0.72372 | 2.026163 | -1.9934  |
| O  | 0.693862 | -1.50906 | -1.59112 |
| O  | -0.68566 | 0.515238 | -2.64364 |
| O  | 0.668849 | 2.315096 | -1.17265 |
| O  | 2.996391 | 1.335603 | -0.29062 |

|   |          |          |          |
|---|----------|----------|----------|
| C | -0.49388 | -3.24711 | 3.295636 |
| C | -0.12336 | 1.951507 | 4.027101 |
| C | 2.04307  | -3.98431 | -0.97576 |
| C | -4.32823 | -2.58613 | -0.30178 |
| C | -4.27705 | 2.586147 | 0.72504  |
| C | -0.91522 | 3.271924 | -3.35709 |
| O | 0.9313   | 1.493766 | 1.380088 |
| O | -1.98488 | -1.61478 | -1.62997 |
| O | -2.00079 | 2.144247 | -0.95615 |
| O | 0.876921 | -2.2455  | 0.986021 |
| C | 2.218571 | 3.953653 | 0.579056 |
| H | 0.409206 | -3.17474 | 3.911021 |
| H | -0.55383 | -4.266   | 2.898447 |
| H | -1.36137 | -3.08305 | 3.943682 |
| H | -0.95441 | 1.694456 | 4.692529 |
| H | 0.806753 | 1.624377 | 4.504051 |
| H | -0.09161 | 3.042185 | 3.931085 |
| H | 2.683281 | -4.47    | -0.23131 |
| H | 1.129175 | -4.5809  | -1.07456 |
| H | 2.567844 | -4.00482 | -1.93708 |
| H | -4.88141 | -2.5617  | 0.643045 |
| H | -4.98706 | -2.21124 | -1.09216 |
| H | -4.08571 | -3.62996 | -0.52749 |
| H | -4.79905 | 2.221414 | 1.615975 |
| H | -4.0153  | 3.636723 | 0.889753 |
| H | -4.9711  | 2.536985 | -0.12065 |
| H | -0.95677 | 4.289417 | -2.95411 |
| H | -1.8354  | 3.091873 | -3.92295 |
| H | -0.07116 | 3.215598 | -4.05271 |
| H | 2.889955 | 3.938283 | 1.444651 |
| H | 1.354312 | 4.578415 | 0.831131 |
| H | 2.748999 | 4.432524 | -0.25122 |
| C | -0.61778 | -1.92412 | -4.12702 |
| H | 0.268143 | -1.61466 | -4.69178 |
| H | -0.60033 | -3.01557 | -4.03639 |
| H | -1.50433 | -1.64667 | -4.70714 |

|    |          |          |          |
|----|----------|----------|----------|
| O  | 3.041916 | -1.3907  | -0.34138 |
| Si | 3.916136 | -0.0193  | -0.02523 |
| C  | 5.345433 | 0.037037 | -1.23096 |
| C  | 4.463083 | -0.06531 | 1.76712  |
| H  | 4.976068 | 0.074087 | -2.2619  |
| H  | 5.982564 | -0.84946 | -1.13262 |
| H  | 5.96952  | 0.922952 | -1.066   |
| H  | 5.062782 | -0.95894 | 1.975723 |
| H  | 3.592153 | -0.08375 | 2.432064 |
| H  | 5.066438 | 0.813175 | 2.02499  |

## 10. Reference

- [1] Y. Sato, H. Imoto, K. Naka, *J. Polym. Sci.* **2020**, *58*, 1456.
